# Supplementary material
Source: publisher figshare collection journal article supplement (https://acs.figshare.com/ndownloader/files/5140624)
Supplement: Supplementary file 1 [file 5140624]

## Supporting Information

Authors: Wontae Lee and Paul Westerhoff

Title: Dissolved organic nitrogen measurement using dialysis pretreatment

Number of pages: 2

Number of table: 1

MDL was determined by multiplying the standard deviation between the replicates ( $n = 7$ ) for each species by the t-value at 99% confidence and  $n-1$  degrees of freedom (US EPA method).

The instrument was checked for the nitrogen recovery with 1 mgN/L of spikes.

Table S1. MDLs and percent recovery of nitrogen containing compounds on high temperature combustion method

| Compound                          | Molecular formula                                               | MDL (mgN/L) | % Recovery              |
|-----------------------------------|-----------------------------------------------------------------|-------------|-------------------------|
| <b>Inorganic nitrogen</b>         |                                                                 |             |                         |
| Potassium nitrate                 | KNO <sub>3</sub>                                                | 0.009       | 99.1 (1.1) <sup>a</sup> |
| Sodium nitrite                    | NaNO <sub>2</sub>                                               | 0.009       | 100.5 (1.4)             |
| Ammonium chloride                 | NH <sub>4</sub> Cl                                              | 0.010       | 102.4 (1.1)             |
| <b>Amino acids</b>                |                                                                 |             |                         |
| Arginine                          | C <sub>6</sub> H <sub>14</sub> N <sub>4</sub> O <sub>2</sub>    | 0.007       | 98.8 (1.8)              |
| Glutamic acid                     | C <sub>5</sub> H <sub>9</sub> NO <sub>4</sub>                   | 0.013       | 97.6 (1.8)              |
| Glycine                           | C <sub>2</sub> H <sub>5</sub> NO <sub>2</sub>                   | 0.016       | 103.0 (2.3)             |
| Proline                           | C <sub>5</sub> H <sub>9</sub> NO <sub>2</sub>                   | 0.010       | 99.3 (1.9)              |
| Tryptophan                        | C <sub>11</sub> H <sub>12</sub> N <sub>2</sub> O <sub>2</sub>   | 0.009       | 101.3 (2.6)             |
| <b>Nucleic acids and proteins</b> |                                                                 |             |                         |
| RNA                               |                                                                 | 0.018       | 102.7 (4.4)             |
| Tri-peptide<br>(Glu-Cys-Gly)      | C <sub>10</sub> H <sub>17</sub> N <sub>3</sub> O <sub>6</sub> S | 0.014       | 98.6 (1.9)              |
| Bovine serum albumin              |                                                                 | 0.019       | N/A                     |
| <b>Other org-N compounds</b>      |                                                                 |             |                         |
| Aniline                           | C <sub>6</sub> H <sub>7</sub> N                                 | 0.014       | 100.7 (1.8)             |
| Imidazole                         | C <sub>3</sub> H <sub>4</sub> N <sub>2</sub>                    | 0.011       | 99.6 (1.8)              |
| Urea                              | CH <sub>4</sub> N <sub>2</sub> O                                | 0.013       | 99.0 (2.4)              |

<sup>a</sup> one standard deviation
